# Supplementary material for: In situ fabrication of graphene decorated microstructured globe artichokes of partial molar nickel cobaltite anchored on a Ni foam as a high-performance supercapacitor electrode
Source: Royal Society of Chemistry journal article supplement (doi:10.1039/c5ra03463a), 2015-01-01
Supplement: c5ra03463a1.pdf [file c5ra03463a1.pdf]

## Electronic Supplementary Information

### ***In situ* fabrication of graphene decorated microstructured globe artichokes of partial molar nickel cobaltite anchored on Ni foam as high-performance supercapacitor electrode**

*Pinjari Syedvali, Gaddam Rajeshkhanna, Ediga Umeshbabu, Gundla Uday Kiran, G. Ranga Rao, and Ponniah Justin\**

E-mail: ponjustin@rgukt.in (P Justin)

#### Supplementary information Fig. 1

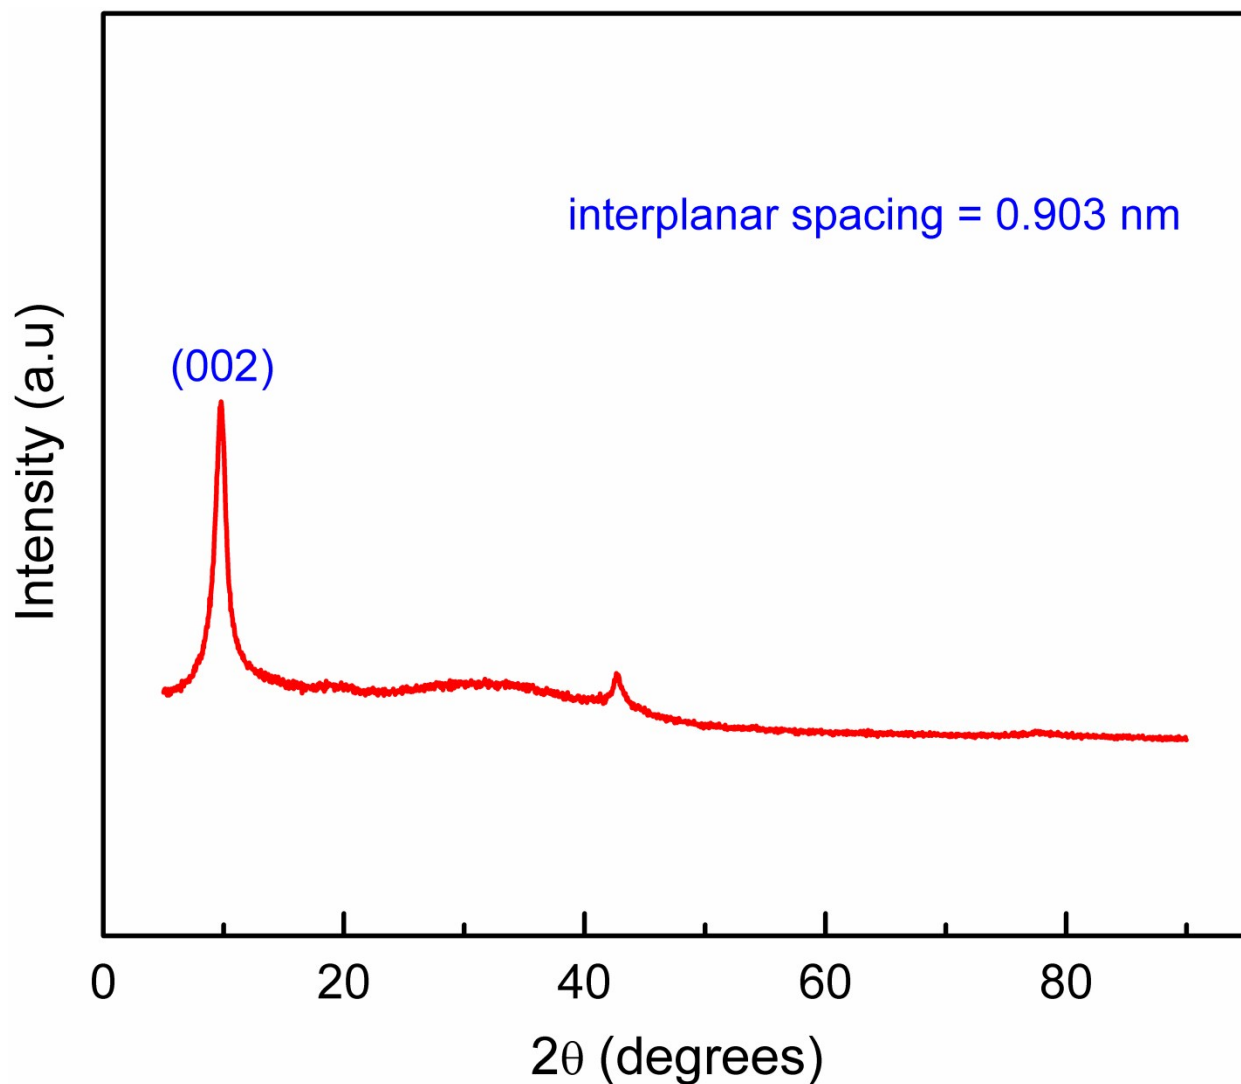

Fig. S1 PXRD spectra of graphene oxide.

Supplementary information Fig. 2

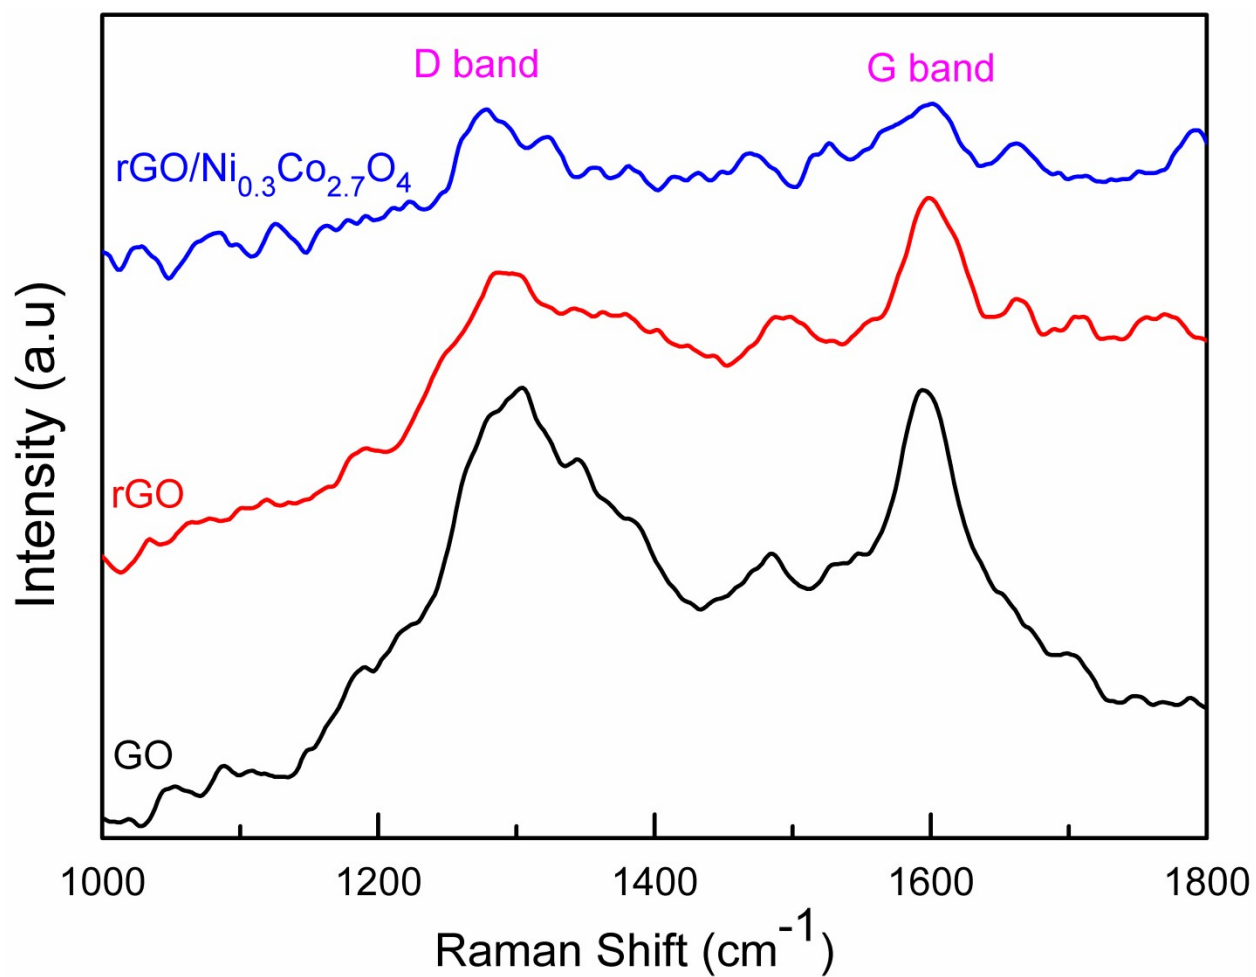

**Fig. S2** FT-Raman spectra of GO, rGO and rGO/Ni<sub>0.3</sub>Co<sub>2.7</sub>O<sub>4</sub> globe artichokes composite electrode.

Supplementary information Fig. 3

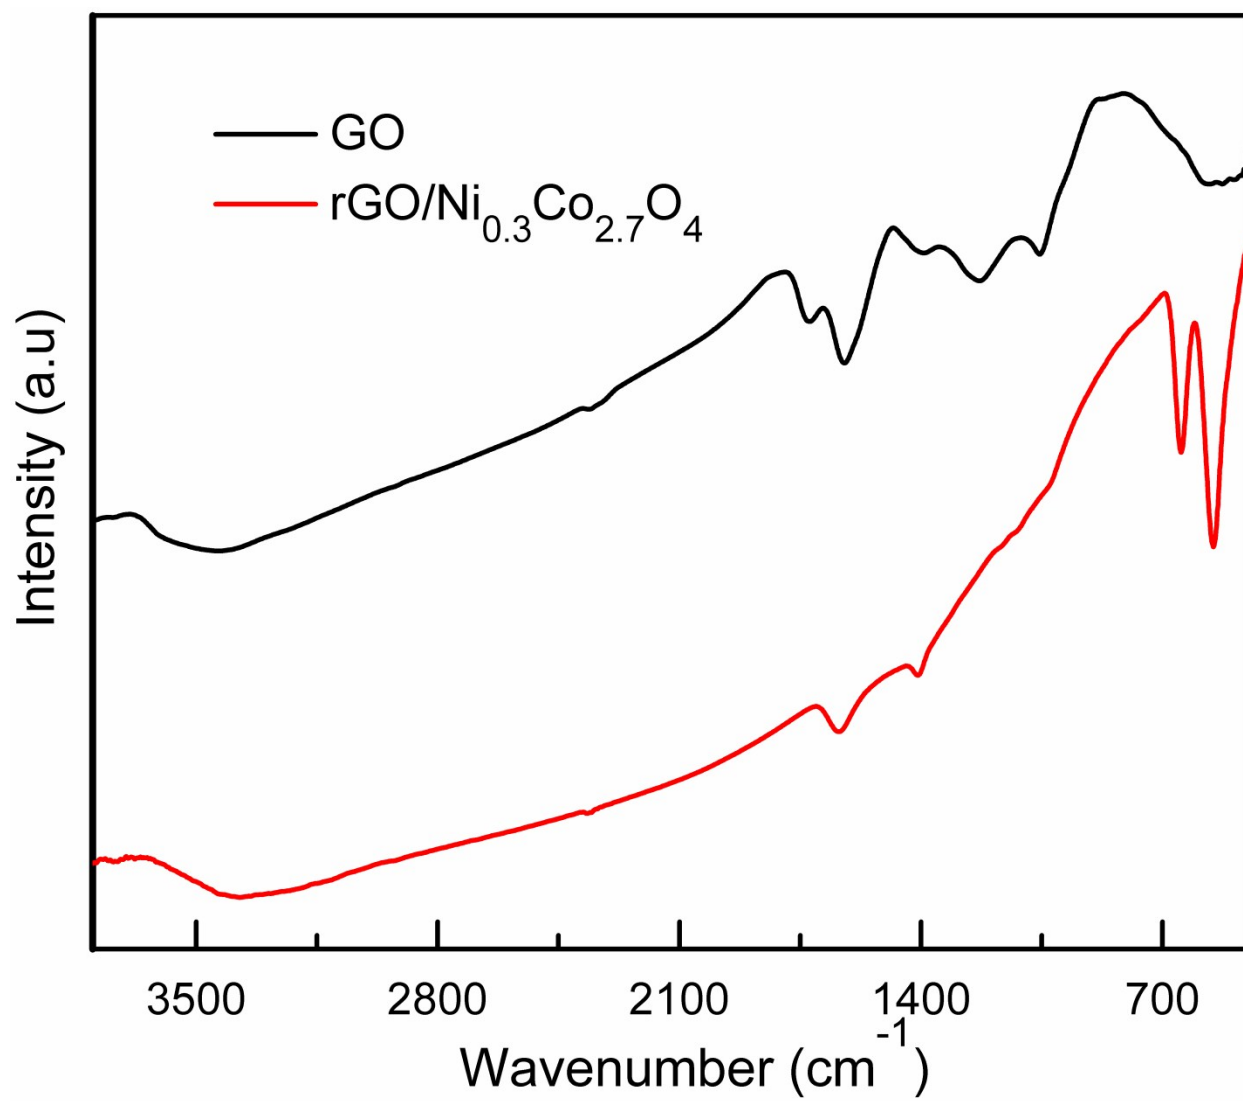

Fig. S3 FT-IR spectra of GO and rGO/Ni<sub>0.3</sub>Co<sub>2.7</sub>O<sub>4</sub> composite electrode.

Supplementary information Fig. 4

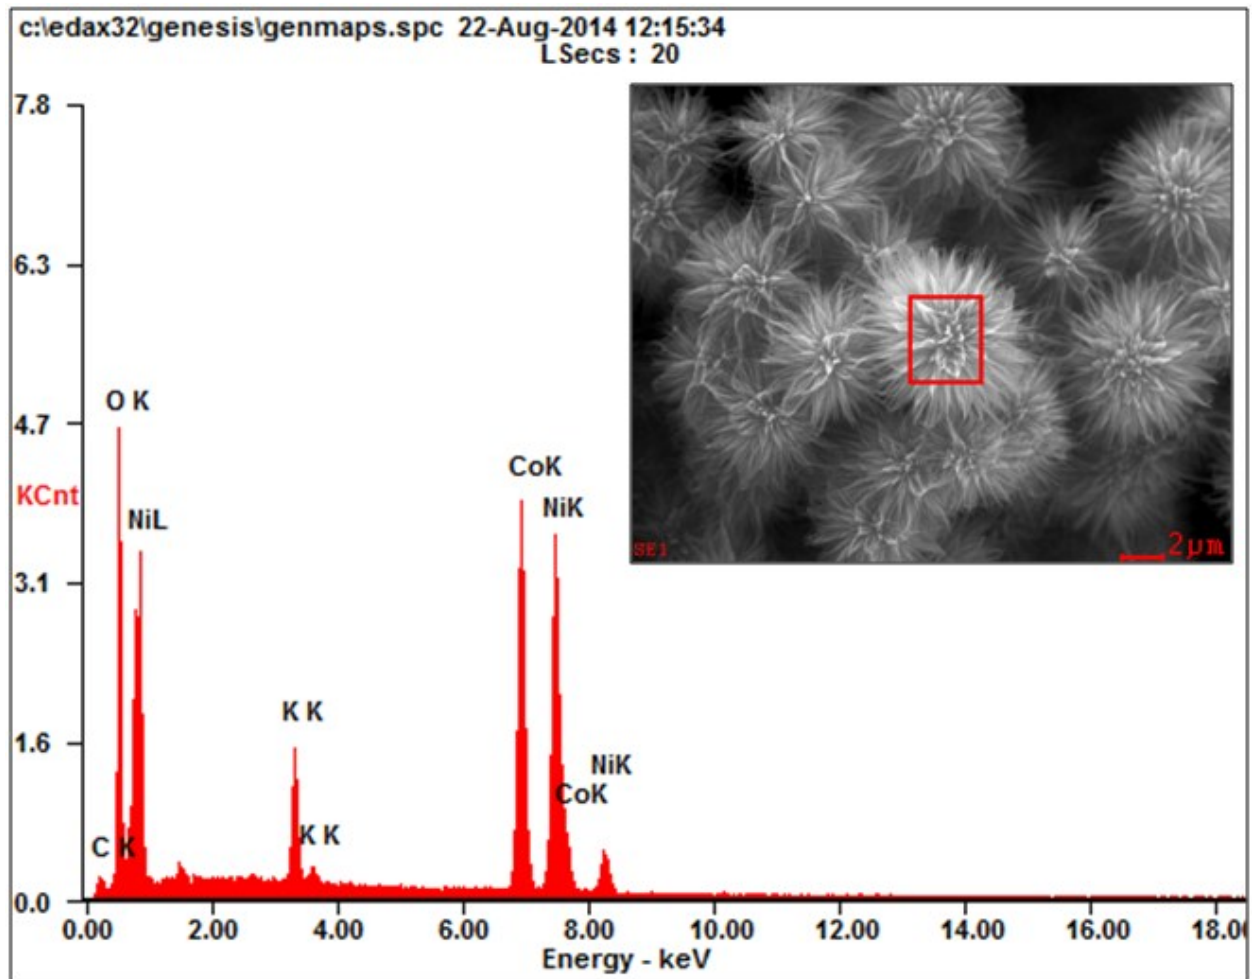

**Fig. S4** Typical EDX spectrum taken from a selected area of the microstructured  $\text{rGO}/\text{Ni}_{0.3}\text{Co}_{2.7}\text{O}_4$  globe artichokes grown on Ni foam.

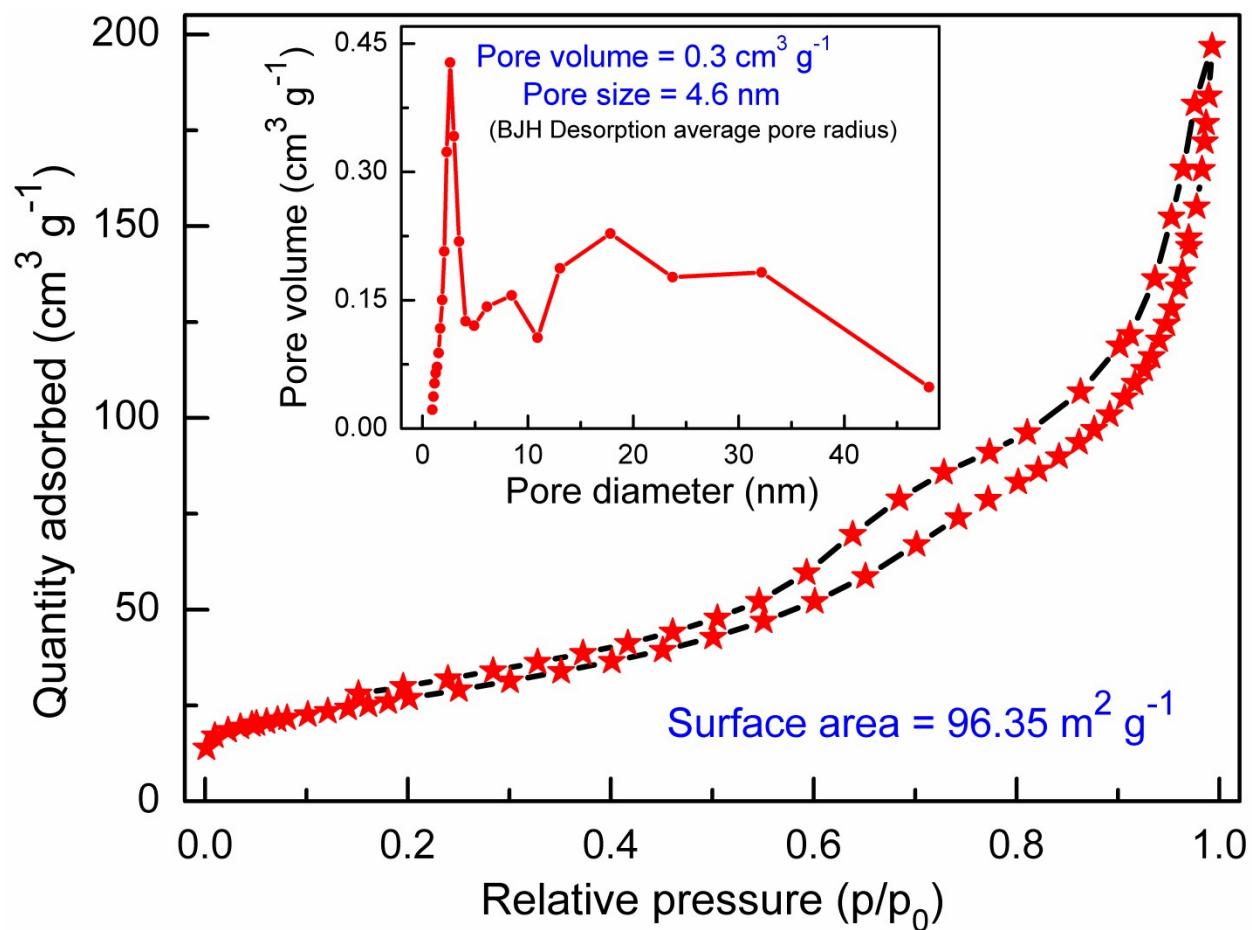

**Fig. S5** Nitrogen adsorption–desorption isotherms of microstructured rGO/Ni<sub>0.3</sub>Co<sub>2.7</sub>O<sub>4</sub> globe artichokes. Inset shows its pore size distribution.
